1 **5' Modifications Improve Potency and Efficacy of DNA Donors for Precision**  
2 **Genome Editing**

3

4

5 Krishna S. Ghanta<sup>†,1</sup>, Gregoriy A. Dokshin<sup>†,1</sup>, Aamir Mir<sup>†,1</sup>, Pranathi Meda Krishnamurthy<sup>1</sup>,  
6 Hassan Gneid<sup>1,2</sup>, Alireza Edraki<sup>1</sup>, Jonathan K. Watts<sup>\*,1,3</sup>, Erik J. Sontheimer<sup>\*,1,4</sup>, Craig C.  
7 Mello<sup>\*,1,4,5</sup>

8

9 **Authors and Affiliations**

10 1. RNA Therapeutics Institute, University of Massachusetts Medical School, 368 Plantation  
11 Street, Worcester, MA 01605-2324, USA.

12 2. Chemistry, University of Southampton, Southampton, SO17 1BJ, UK

13 3. Department of Biochemistry and Molecular Pharmacology, University of Massachusetts  
14 Medical School, Worcester, MA, USA.

15 4. Program in Molecular Medicine, University of Massachusetts Medical School, Worcester,  
16 MA, USA.

17 5. Howard Hughes Medical Institute.

18 † Contributed equally

19 \*Correspondence to: [jonathan.watts@umassmed.edu](mailto:jonathan.watts@umassmed.edu); [erik.sontheimer@umassmed.edu](mailto:erik.sontheimer@umassmed.edu);  
20 [craig.mello@umassmed.edu](mailto:craig.mello@umassmed.edu)

21

22 **Nuclease-directed genome editing is a powerful tool for investigating physiology and has**  
23 **great promise as a therapeutic approach that directly addresses the underlying genetic basis**  
24 **of disease. In its most precise form, genome editing can use cellular homology-directed repair**  
25 **(HDR) pathways to insert information from an exogenously supplied DNA repair template**  
26 **(donor) directly into a targeted genomic location. Unfortunately, particularly for long**  
27 **insertions, toxicity and delivery considerations associated with repair template DNA can**  
28 **limit the number of donor molecules available to the HDR machinery, thus limiting HDR**  
29 **efficacy. Here, we explore modifications to both double-stranded and single-stranded repair**  
30 **template DNAs and describe simple 5' end modifications that consistently and dramatically**  
31 **increase donor potency and HDR efficacy across cell types and species.**

32 In the nematode worm *C. elegans*, efficient genome editing can be achieved by direct  
33 injection of editing enzyme guide-RNA ribonucleoprotein (RNP) complexes into the syncytial  
34 ovary<sup>1</sup>. Such injections afford simultaneous access of the editing machinery to hundreds of meiotic  
35 germ nuclei within a common cytoplasm (**Supplementary Fig. 1a**). In the worm germline, high  
36 rates of HDR are readily achieved using short (under ~200 nucleotide [nt]), single-stranded  
37 oligodeoxynucleotide (ssODN) donor templates that permit insertions of up to ~150 nt in length<sup>2</sup>,  
38<sup>3 4</sup>. However, HDR is less efficient by 1–2 orders of magnitude when longer, double-stranded DNA  
39 (dsDNA) templates are used as donors<sup>4</sup>.

40 Longer repair templates are likely at a disadvantage for multiple reasons. First, toxicity  
41 associated with high concentrations of DNA limits the safe injectable amount of a ~1kb dsDNA  
42 donor to roughly ~10-fold fewer molecules than is commonly used for a 200 nt ssODN donor<sup>2-5</sup>.  
43 Second, long dsDNA donor molecules may not readily transit across the nuclear envelope into the  
44 post-mitotic germ-nuclei, further reducing the effective concentration at the site of repair. We

45 hypothesized that the disparity in availability of ssODN and dsDNA donor molecules inside germ  
46 nuclei could account for the differences in observed HDR efficiencies. To increase potency of long  
47 dsDNA donors we set out to attach an SV40 peptide containing the core nuclear localization signal  
48 (NLS) to the donor molecule, reasoning that the modification might promote nuclear uptake and  
49 retention. Previous studies using mammalian cell cultures demonstrated that the addition of an  
50 NLS enhances nuclear uptake of plasmid DNA following transfection <sup>6</sup>. To attach an NLS to a  
51 long donor DNA, we first conjugated 15-nucleotide 2'-O-methyl (2'OMe) RNA adapters via a tri-  
52 or tetraethylene glycol (TEG) linkage to the 5' ends of two target-locus specific synthetic ~20-  
53 nucleotide DNA oligonucleotides. The DNA sequences in these molecules serve as PCR primers  
54 to amplify the donor from plasmid containing the homology arms and green fluorescent protein  
55 (GFP) sequence for in-frame insertion into the target gene of interest (**Fig. 1a**). In addition, we  
56 synthesized an NLS peptide linked to a peptide nucleic acid (PNA) complementary to the 15nt  
57 2'OMe-RNA adapter. Attachment of the NLS to the donor was then achieved by simply annealing  
58 the PNA::NLS molecules to the 2'OMe-RNA adapters on the ends of the PCR product.

59 To test these modified donors, we first attempted to insert GFP into the *csr-1* locus (see  
60 Methods for details). We employed a co-CRISPR assay <sup>7,8</sup>, to measure HDR efficacy. For this  
61 assay we chose a CRISPR RNP designed to generate indels in the easily scored *dpy-10* locus. HDR  
62 efficacy was scored as a fraction of F1 *dpy-10* mutant animals that properly express GFP::CSR-1,  
63 which forms bright peri-nuclear foci in germ cells (**Supplementary Fig. 1b**). To increase assay  
64 sensitivity, we chose an initial donor DNA concentration of 10 ng/μl (~35-fold less than previously  
65 recommended) <sup>2</sup>. With unmodified dsDNA donors, this donor concentration yielded only 0.92%  
66 GFP insertions (**Fig. 1b**). Strikingly, however, under otherwise identical injection conditions, this  
67 same dsDNA donor modified at both 5' ends with 2'OMe-RNA::TEG annealed to PNA::NLS

68 yielded 29.5% GFP positive animals (~8 GFP+ F1 progeny per injected animal) – an increase of  
69 >30-fold (**Fig. 1b**). Interestingly, donors prepared with 2'OMe-RNA::TEG end-modification, but  
70 without annealing PNA::NLS, also substantially improved HDR efficacy to 15.7% (~4 GFP+ F1  
71 progeny per injected animal). To our surprise, annealing a PNA without an NLS resulted in 35.1%  
72 GFP insertion efficacy (~9 GFP+ F1 progeny per injected animal), indicating that the NLS was  
73 not essential to promote HDR. Simply co-injecting PNA with plain dsDNA donor failed to boost  
74 HDR (2.2%), indicating that PNA-based HDR improvement depends on the presence of the  
75 2'OMe-RNA::TEG moiety (**Fig. 1b**). To test the generality of these findings we targeted GFP  
76 insertions into an independent locus, *glh-1*, and found comparable increases in efficiency and  
77 dependence on 2'OMe-RNA::TEG, as well as PNA (**Fig. 1c**).

78 We next tested whether end modifications would increase dsDNA donor potency in  
79 mammalian cell culture systems. We first used HEK293T cells carrying a modified version of the  
80 “traffic light” reporter (TLR)<sup>9</sup> (Mir,A. *et al.*, manuscript in preparation). Briefly, in this system  
81 Cas9 targets a “broken” GFP followed by a frameshifted mCherry reporter. Imprecise repair  
82 restores the reading frame in a subset of indels, resulting in mCherry (red) fluorescence.  
83 Conversely, precisely templated repair of the same lesion results in GFP (green) fluorescence.  
84 Using flow cytometry, the percentage of cells expressing either GFP (precise) or mCherry  
85 (imprecise) among the total number of cells can be easily quantified. To perform the TLR assay  
86 we electroporated reporter cells with Cas9- and single guide RNA (sgRNA)- encoding plasmids,  
87 along with either an unmodified dsDNA donor, a 2'OMe-RNA::TEG donor, or the end-modified  
88 donor annealed to PNA::NLS. Strikingly, across a range of donor amounts we observed a  
89 consistent and significant increase in HDR efficacy with the end-modified donors (**Fig. 2a**). The  
90 efficacy peaked at 1.2 pmol of 2'OMe-RNA::TEG modified donor that yielded 51.8% GFP-

91 positive cells, compared to 22% GFP<sup>+</sup> cells obtained with the same amount of unmodified donor  
92 (**Fig. 2a**). This gain of GFP<sup>+</sup> cells was accompanied by a corresponding reduction in mCherry<sup>+</sup>  
93 cells (**Fig. 2b**). As expected, with reduced donor amount the HDR efficacy declined for all donor  
94 types, and the number of GFP<sup>+</sup> cells also declined at donor amounts over 2 pmol (**Fig. 2a, b**). The  
95 maximum HDR efficacy for unmodified donors (25% GFP<sup>+</sup> cells) was achieved at 1.6 pmol.  
96 Notably, the 2'OMe-RNA::TEG modified donors matched this efficacy of 25% at less than 0.4  
97 pmol, illustrating that the modified donor is approximately 4-fold more potent (**Fig. 2a**). Although  
98 less dramatic than the 30-fold efficacy increase observed in worms (which appear to have a much  
99 lower basal HDR efficacy), we consistently observed more than 2-fold increases in HDR efficacy  
100 using this mammalian cell culture system. Interestingly, however, the addition of PNA::NLS or  
101 PNA alone to the 2'OMe-RNA::TEG end-modified donor provided no additional increase in HDR  
102 efficacy in cell culture (**Fig. 2a, Supplementary Fig 2**).

103 We next used the TLR assay to define the features of the 2'OMe-RNA::TEG adapter that  
104 promote HDR at the optimal 1.2 pmol donor amount (**Fig. 2c, d**). Interestingly, we found that  
105 donors modified with either the 2'OMe-RNA alone or with TEG alone consistently boosted HDR  
106 efficiencies (**Fig. 2c**). Moreover, even donors with TEG modification at the 5' end of only one of  
107 the two strands provided a significant boost in HDR efficacy (**Supplementary Fig. 3a**). Finally,  
108 different lengths of PEG (4, 6, 9 or 12 ethylene glycol repeats) showed similar efficacy  
109 (**Supplementary Fig. 4a**). In all cases we observed a corresponding decline in mCherry<sup>+</sup>,  
110 imprecisely edited, cells (**Fig. 2d, Supplementary Fig. 3b, 4b**).

111 To explore the utility of end-modified donors for repair at other genomic locations, we  
112 generated donors and guides to integrate full-length *eGFP* at the endogenous *GAPDH* and  
113 *TOMM20* loci in HEK293T cells. The *GAPDH* donor was designed to integrate IRES-eGFP in the

114 3'-UTR of the *GAPDH* locus, whereas the *TOMM20* donor was designed to tag the C-terminus of  
115 the mitochondrial protein TOM20<sup>10, 11</sup>. By measuring the fraction of cells expressing eGFP by  
116 flow cytometry, we found that the TEG, 2'OMe-RNA or 2'OMe-RNA::TEG modifications  
117 consistently increased the fraction of eGFP cells (by up to 4-fold) when compared to unmodified  
118 dsDNA donor (**Fig. 2e, f**). Again, in these loci, as in the TLR assay (**Fig. 2c**), we noted that the  
119 presence of TEG was necessary for maximal HDR and that TEG alone performed better than  
120 2'OMe-RNA alone. As expected, in all cases, precise insertion of eGFP was Cas9-dependent.

121 We next tested modified donors in cell types that are typically more resistant to HDR than  
122 are the HEK293T cells used in the above studies. To do this we generated 2'OMe-RNA::TEG  
123 donors and Cas9 RNPs designed to target the insertion of eGFP at the *TOMM20* locus in hTERT-  
124 immortalized human foreskin fibroblasts (HFFs) and at the *Gapdh* locus in Chinese hamster ovary  
125 (CHO) cells. Although the overall efficiencies of HDR were lower than those observed in  
126 HEK293T cells, the use of modified donors led to a 2.3-fold and 6-fold increase in HDR in HFF  
127 and CHO cells respectively (**Fig. 2g, h**).

128 The experiments described thus far employed dsDNA donors that are easy to generate by  
129 PCR; however, single stranded DNA (ssDNA) donors have become widely used in many HDR  
130 editing protocols. We therefore tested end modifications to ~800 nt long ssDNA donors generated  
131 by transcription and reverse transcription of PCR products. As observed for dsDNA donors, we  
132 found that the addition of a 2'OMe-RNA::TEG tail to a long ssDNA donor elicited a consistent  
133 and significant boost in HDR efficacy over unmodified ssDNA donors (with corresponding  
134 reductions in imprecise repair) across a range of concentrations in the TLR assay (**Fig. 2i**,  
135 **Supplementary Fig. 5a**). Efficacy of modified ssDNA donor was 2.3 times higher than  
136 unmodified donor at 1 pmol and peaked to 22.5% at 6 pmol (versus 15.9% for unmodified).

137 Furthermore, the maximal efficacy of the plain donor (16% at 8 pmol) could be achieved at less  
138 than 2 pmol of 2'OMe-RNA::TEG donor, again highlighting the improved potency of the modified  
139 donors.

140 The highest reported yields of HDR in both cultured mammalian cells and *C. elegans* have  
141 been achieved using short ( $\leq 200$  nt), synthetic ssODN donors delivered at high concentrations<sup>2-</sup>  
142 <sup>4, 12</sup>. To test 5' modified ssODNs for HDR efficacy we used the sensitive GFP-to-BFP conversion  
143 assay in K562 cells (**Fig. 2j**). At first, we were surprised to find that 5' modified ssODNs gave no  
144 increase in HDR efficacy, ~30%, when tested at 10pmol, an amount at which unmodified ssODNs  
145 gave a peak efficacy of >45% HDR (**Fig. 2j**). In order to fully investigate the relative potency of  
146 modified ssODNs we decided to explore a broader range of concentrations. Our studies revealed  
147 that both modified and unmodified donors exhibited similar maximal levels of BFP positive cells  
148 but differed greatly in their donor amount dependence. Strikingly, the end modified ssODNs  
149 achieved maximal efficacy at amounts 10-fold lower than unmodified donor (**Fig.2j**). Interestingly  
150 TEG-modified ssODN donors showed dose-limiting toxicity that scaled with their increased HDR  
151 potency (**Fig. 2j**) – suggesting that the mechanisms of toxicity and improved HDR efficacy may  
152 be related (see further discussion below). The increased potency of HDR was observed with  
153 concurrent reductions in imprecise editing as measured by the frequency of GFP(-) and BFP(-)  
154 cells (**Supplementary Fig. 5b**).

155 To explore how 3' modifications affect HDR efficacy we added either internal  
156 phosphorothioate (PS) or terminal 2'OMe-RNA and/or TEG modifications to the 3' ends of  
157 ssODNs. Interestingly, 2'OMe-RNA and/or TEG modifications on the 3' terminal hydroxyl group  
158 – modifications that would prevent these molecules from priming DNA synthesis or undergoing  
159 ligation – led to a significant decrease in HDR efficacy relative to 5' modification alone (**Fig. 2k**,

160 **Supplementary Fig. 6).** In contrast, modification of the 3' internal phosphate linkages as PS  
161 modifications, which do not block the terminal hydroxyl group, did not impede HDR. The  
162 differences between the effects of terminal (2'OMe-RNA and/or TEG) and non-terminal (PS) 3'  
163 modifications on HDR efficacy of the 5'-terminally modified donors suggest that the mechanism  
164 of HDR improvement requires the availability of a 3'-OH group. Unlike the modifications  
165 conjugated to the 5' terminus, at 0.5 pmol of donor, internal PS modifications at the 5'-end did not  
166 improve HDR efficacy compared to the unmodified donor (**Supplementary Fig. 6**).

167         Here we have employed the simple approach of chemically modifying the repair template  
168 to promote HDR. We initially hypothesized that exploiting active nuclear import would increase  
169 donor potency. In *C. elegans*, the addition of complementary PNA and PNA::NLS to 2'OMe-  
170 RNA::TEG donors led to improved HDR efficacy. In contrast, these adducts did not improve  
171 efficacy in mammalian cells over use of the 2'OMe-RNA::TEG donor itself. One potential  
172 explanation for this interesting difference is that the site of injection in *C. elegans* is a post-mitotic  
173 ovary, as compared with rapidly dividing mammalian cells. Thus, the putative role of PNA::NLS  
174 in getting donor past the nuclear envelope should be further explored in other systems involving  
175 post-mitotic or slowly-dividing cell types. The finding that annealing PNA and PNA-peptide  
176 fusions to the 2'OMe-RNA stimulates HDR in *C. elegans* raises the question of what other nucleic  
177 acid or nucleic acid-like adapters might also stimulate HDR. We have yet to scratch the surface of  
178 potential chemistries to explore with this modular system.

179         We were surprised to find that the 5' addition of either TEG or 2'OMe-RNA alone was  
180 sufficient to dramatically improve HDR potency. Oligonucleotides bearing these simple, easy to  
181 synthesize chemistries have already proven to be safe and well tolerated in other clinical  
182 applications<sup>13</sup>. These modifications increased the potency of dsDNA, ssDNA and ssODN donors,



183 allowing efficient editing at significantly lower amounts. We find it intriguing that long DNA  
184 donors exhibited both increased potency and maximal efficacy when modified, while short  
185 ssODNs exhibited increased potency over a broader range of donor amounts without an increase  
186 in the maximal levels of templated repair. This difference requires further study but could be  
187 explained if ssODN and longer DNA donors experience different dose-limiting barriers. Perhaps  
188 the number of molecules of DNA (or DNA free ends inside cells) represents a dose limiting barrier  
189 for small ssODNs that longer dsDNA molecules never encounter due to other limitations.  
190 Consistent with this idea, unmodified long dsDNA donors begin to plateau in efficacy at nearly 4-  
191 fold more mass, but ~10-fold lower molar amounts than ssODNs. When end modified, both types  
192 of donor exhibit similar maximal efficacy in the 1-2pmol range. It is possible that 5' end  
193 modifications boost HDR by preventing end joining reactions that would otherwise decrease the  
194 available number of donor molecules in cells. However, this mechanism would also increase any  
195 toxicity associated with DNA free ends. For long DNA where free-end related toxicity may not be  
196 limiting, both potency and maximal efficacy increase. In contrast, for shorter ssODNs, where free  
197 ends may be driving the dose limiting toxicity, potency is increased but not maximal efficacy.  
198 Nevertheless, this dramatic potency increase suggests that terminally modified ssODNs may be  
199 particularly useful under conditions where donor concentration is limiting (such as delivery *in*  
200 *vivo*).

201 Potential benefits of end modifications may include prolonged intracellular donor molecule  
202 stability, improved nuclear localization, or an increased ability of the donor molecule to engage  
203 the HDR machinery. For example, as suggested above, the 5' end modifications employed here  
204 may block end joining reactions that would otherwise reduce the available molar quantities of  
205 repair template molecules. However, it is unlikely that merely blocking end joining explains the

206 improved efficacy, as modifications to the 3' ends, which should also block end-to-end ligation,  
207 were unhelpful. Taken together our findings suggest that a combination of blocking the 5' end  
208 while leaving a 3' OH end, perhaps to prime repair synthesis, are both important.

209 We initiated these investigations to explore why long DNA donors were so much less  
210 efficacious than ssODN donors in *C. elegans*. The chemical modifications we have made to the 5'  
211 ends of donor molecules have very significantly closed that gap in efficacy. The findings that these  
212 same modifications also increase the potency of short ssODN donors raise the possibility that long  
213 modified dsDNA donors are approaching a level of efficacy where donor availability is no longer  
214 limiting for HDR. Thus, methods that block alternative imprecise repair pathways<sup>14-18</sup> or reduce  
215 damage responses may synergize with 5' end modified donors to stimulate HDR to even higher  
216 levels.

217

218

219

220

221

222

223

224

225

226

227

228 **Acknowledgements.** This work was funded by: American Cancer Society Fellowship (G.A.D.),  
229 Howard Hughes Medical Institute (C.C.M.), NIH PO1# HD078253 (C.C.M), and institutional  
230 funds to J.K.W and E.J.S from University of Massachusetts Medical School. We are grateful to  
231 Scot Wolfe for sharing the Cas9 expression plasmid and to Ahmet Ozturk for help with statistical  
232 analyses.  
233

234 **Fig. 1.** 5' dsDNA donor modifications promote HDR in *C. elegans* germ cells

235 **(a).** Schematic representation of the end-modified dsDNA donor design. 2'OMe-RNA::TEG  
236 moieties are covalently attached to 5' ends of each DNA strand and PNA::NLS is annealed to the  
237 RNA overhangs. HDR efficacy at the **(b).** *csr-1* and **(c).** *glh-1* loci using unmodified or 2'OMe-  
238 RNA::TEG-modified donors alone, or with addition of PNA or PNA::NLS, is plotted as a fraction  
239 of GFP+ *dpy-10* animals. Each point represents the average GFP+ fraction in a brood from a single  
240 injected P0 animal. Horizontal lines mark the mean. The number of GFP+ over total number of  
241 *dpy-10* edited animals scored for each condition is shown in parentheses. P-values were calculated  
242 using One-way ANOVA and in all cases end-modified donors were compared to the unmodified  
243 donor (Tukey's multiple comparisons test (\*\*\*\*P < 0.0001; \*\*\*P < 0.001; \*\*P < 0.01; ns, not  
244 significant).

245

246 **Fig. 2.** TEG and 2'OMe-RNA at 5' ends of donors promote HDR in mammalian cells.

247 Editing efficacy plotted as percentage of **(a)** GFP+ (HDR) and **(b)** mCherry+ (NHEJ) HEK293T  
248 TLR cells at different amounts of unmodified, 2'OMe-RNA::TEG-modified, or modified and  
249 PNA::NLS-annealed dsDNA donors. Editing efficacy plotted as percentage of **(c)** GFP+ (precise)  
250 and **(d)** mCherry+ (imprecise) HEK293T TLR cells at 1.2 pmol of donor. Efficacy of eGFP  
251 integration at **(e)** *TOMM20* and **(f)** *GAPDH* loci in HEK293T cells with and without Cas9, using  
252 modified donors and plotted as percentage of GFP+ cells. Efficacy of eGFP integration at the **(g).**  
253 *TOMM20* locus in HFF and **(h)** *Gapdh* locus in CHO cells using dsDNA donors with and without  
254 2'OMe-RNA::TEG modifications at the 5' ends. **(i)** Editing efficacy plotted as percentage of GFP+  
255 (precise) HEK293T TLR cells at different amounts of unmodified and 2'OMe-RNA::TEG-  
256 modified long (800 nt) ssDNA donors. **(j)** Editing efficacy of GFP-to-BFP reporter conversion in

257 K562 cells using different amounts of unmodified and 2'OMe-RNA::TEG-modified 66 nt ssODN  
258 donors plotted as percentage of BFP+ cells (precise). **(k)**. Editing efficacy of GFP-to-BFP  
259 conversion in K562 cells using 0.5 pmol of ssODN donors modified at the 5' end alone, the 3' end  
260 alone, or at both the 5' and 3' ends, with phosphorothioate (PS), TEG, 2'OMe-RNA, or 2'OMe-  
261 RNA::TEG, plotted as percentage of BFP+ cells (precise). Complete figure of panel **k** is shown,  
262 along with other modifications, in **Supplementary Fig. 6**. All data points represent a mean of at  
263 least three independent replicates and all error bars represent standard deviation. P-values were  
264 calculated using either one-way or two-way ANOVA and in all cases end-modified donors were  
265 compared to the unmodified donor unless indicated otherwise (Tukey's multiple comparisons test;  
266 \*\*\*\*P < 0.0001; \*\*\*P < 0.001; \*\*P < 0.01; \*P < 0.05; ns- not significant).

267  
268  
269  
270  
271  
272  
273  
274  
275  
276  
277  
278  
279

## 280 References

- 281 1. Cho, S.W., Lee, J., Carroll, D., Kim, J.S. & Lee, J. Heritable gene knockout in  
282 *Caenorhabditis elegans* by direct injection of Cas9-sgRNA ribonucleoproteins. *Genetics*  
283 **195**, 1177-1180 (2013).
- 284 2. Paix, A., Folkmann, A., Rasoloson, D. & Seydoux, G. High Efficiency, Homology-  
285 Directed Genome Editing in *Caenorhabditis elegans* Using CRISPR-Cas9  
286 Ribonucleoprotein Complexes. *Genetics* **201**, 47-54 (2015).
- 287 3. Prior, H., Jawad, A.K., MacConnachie, L. & Beg, A.A. Highly Efficient, Rapid and Co-  
288 CRISPR-Independent Genome Editing in *Caenorhabditis elegans*. *G3 (Bethesda)* **7**, 3693-  
289 3698 (2017).
- 290 4. Dokshin, G.A., Ghanta, K.S., Piscopo, K.M. & Mello, C.C. Robust genome editing with  
291 short single-stranded and long, partially single-stranded DNA donors in *C.*  
292 *elegans*. *bioRxiv* (2018).
- 293 5. Mello, C.C., Kramer, J.M., Stinchcomb, D. & Ambros, V. Efficient gene transfer in  
294 *C.elegans*: extrachromosomal maintenance and integration of transforming sequences.  
295 *EMBO J* **10**, 3959-3970 (1991).
- 296 6. Branden, L.J., Mohamed, A.J. & Smith, C.I. A peptide nucleic acid-nuclear localization  
297 signal fusion that mediates nuclear transport of DNA. *Nat Biotechnol* **17**, 784-787 (1999).
- 298 7. Kim, H. et al. A co-CRISPR strategy for efficient genome editing in *Caenorhabditis*  
299 *elegans*. *Genetics* **197**, 1069-1080 (2014).
- 300 8. Arribere, J.A. et al. Efficient marker-free recovery of custom genetic modifications with  
301 CRISPR/Cas9 in *Caenorhabditis elegans*. *Genetics* **198**, 837-846 (2014).
- 302 9. Certo, M.T. et al. Tracking genome engineering outcome at individual DNA breakpoints.  
303 *Nat Methods* **8**, 671-676 (2011).
- 304 10. He, X. et al. Knock-in of large reporter genes in human cells via CRISPR/Cas9-induced  
305 homology-dependent and independent DNA repair. *Nucleic Acids Res* **44**, e85 (2016).
- 306 11. Roberts, B. et al. Systematic gene tagging using CRISPR/Cas9 in human stem cells to  
307 illuminate cell organization. *Mol Biol Cell* **28**, 2854-2874 (2017).
- 308 12. Richardson, C.D., Ray, G.J., DeWitt, M.A., Curie, G.L. & Corn, J.E. Enhancing homology-  
309 directed genome editing by catalytically active and inactive CRISPR-Cas9 using  
310 asymmetric donor DNA. *Nat Biotechnol* **34**, 339-344 (2016).
- 311 13. Fowles, J., Banton, M., Klapacz, J. & Shen, H. A toxicological review of the ethylene  
312 glycol series: Commonalities and differences in toxicity and modes of action. *Toxicol Lett*  
313 **278**, 66-83 (2017).
- 314 14. Chu, V.T. et al. Increasing the efficiency of homology-directed repair for CRISPR-Cas9-  
315 induced precise gene editing in mammalian cells. *Nat Biotechnol* **33**, 543-548 (2015).
- 316 15. Maruyama, T. et al. Increasing the efficiency of precise genome editing with CRISPR-  
317 Cas9 by inhibition of nonhomologous end joining. *Nat Biotechnol* **33**, 538-542 (2015).
- 318 16. Gutschner, T., Haemmerle, M., Genovese, G., Draetta, G.F. & Chin, L. Post-translational  
319 Regulation of Cas9 during G1 Enhances Homology-Directed Repair. *Cell Rep* **14**, 1555-  
320 1566 (2016).
- 321 17. Lin, S., Staahl, B.T., Alla, R.K. & Doudna, J.A. Enhanced homology-directed human  
322 genome engineering by controlled timing of CRISPR/Cas9 delivery. *Elife* **3**, e04766  
323 (2014).

- 324 18. Yang, D. et al. Enrichment of G2/M cell cycle phase in human pluripotent stem cells  
325 enhances HDR-mediated gene repair with customizable endonucleases. *Sci Rep* **6**, 21264  
326 (2016).  
327

Fig. 1

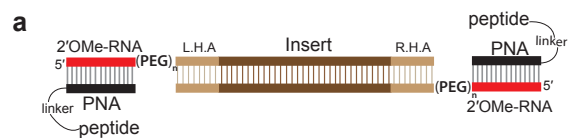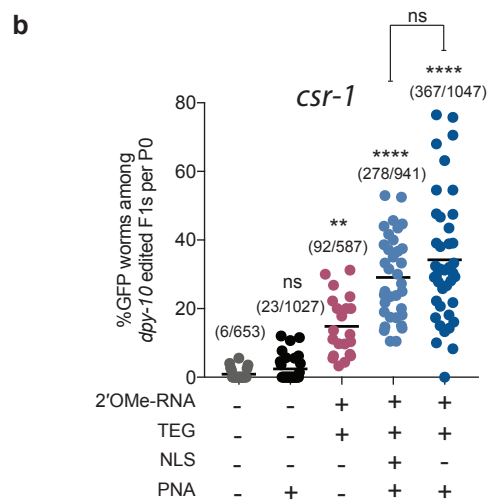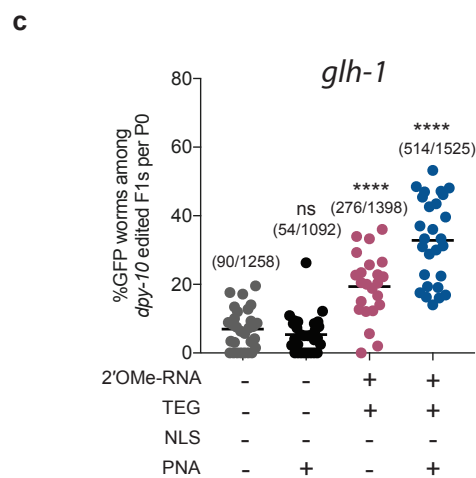



Fig. 2

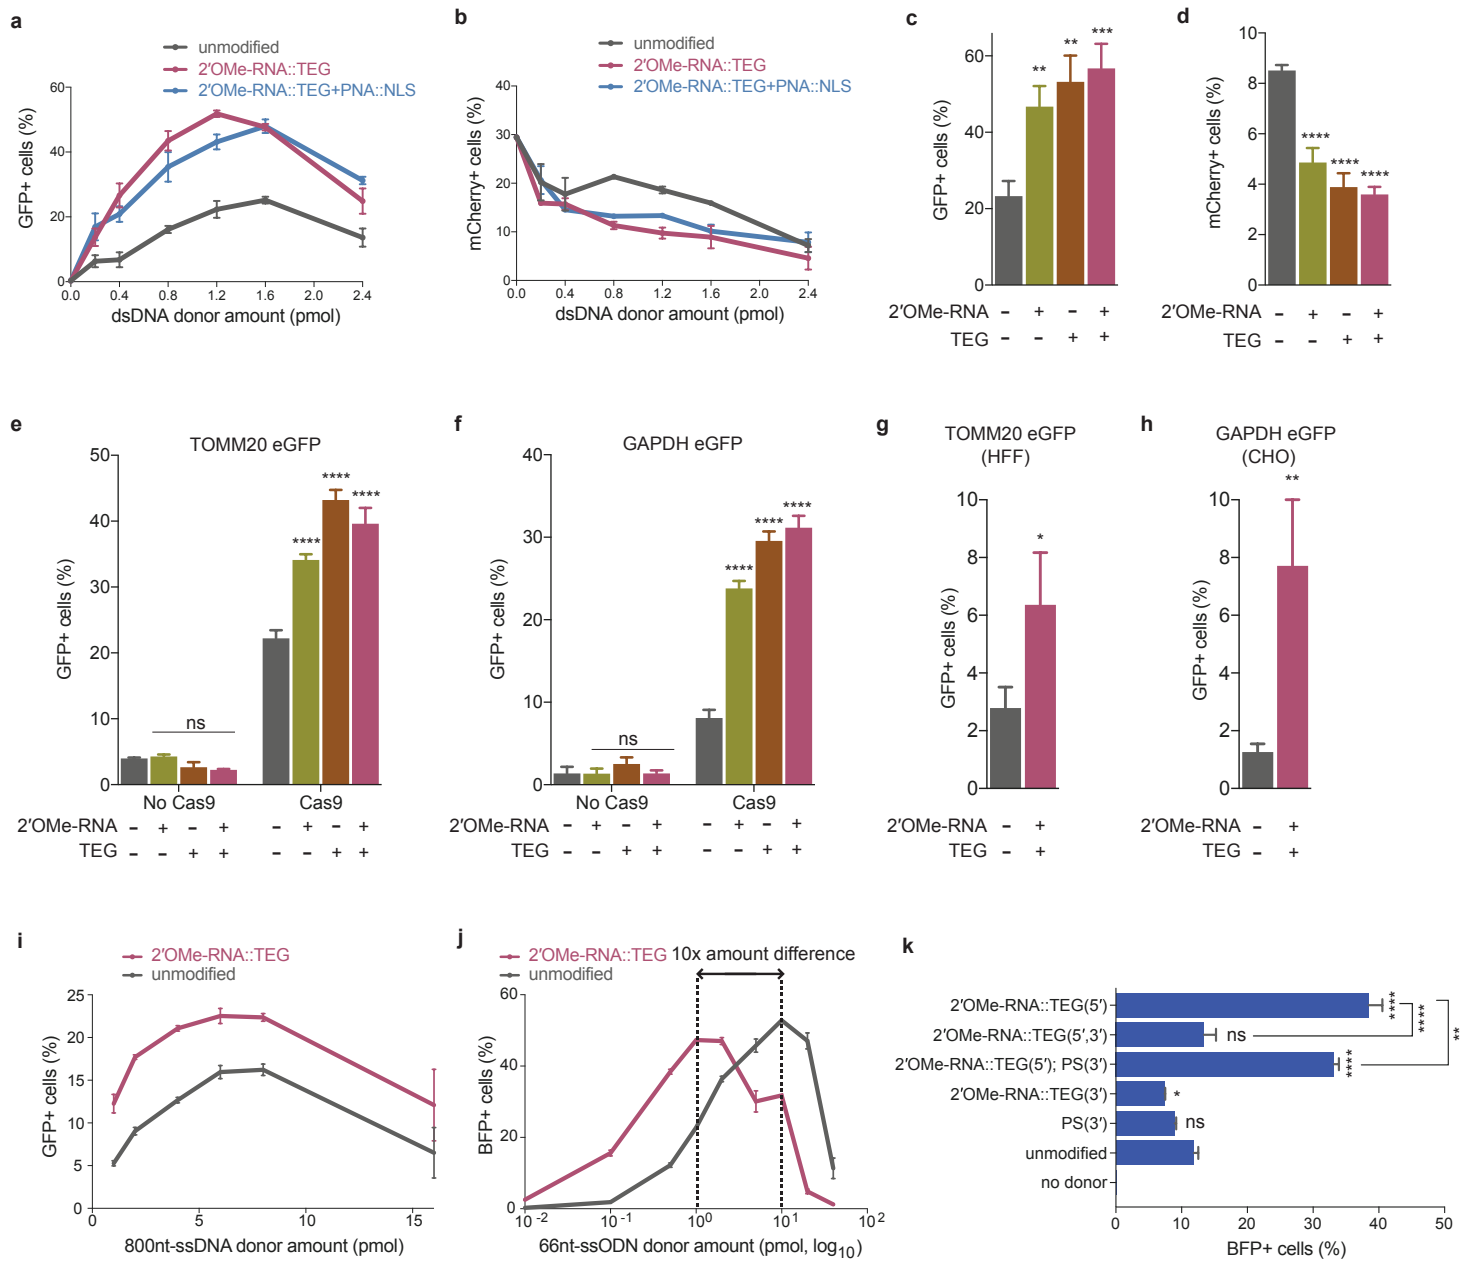

## Supplementary Materials for

# **5' Modifications Improve Potency and Efficacy of DNA Donors for Precision Genome Editing**

### **This PDF file includes:**

Materials and Methods  
Supplementary Figs. 1 to 7

## Materials and Methods

**Synthesis of PNA-NLS peptide.** PNA oligomers were synthesized at 2  $\mu$ mol scale on Fmoc-PAL-PEG-PS solid support (Applied Biosystems) using an Expedite 8909 synthesizer. Fmoc/Bhoc-protected PNA monomers (Link Technologies) were dissolved to 0.2M in anhydrous *N*-methylpyrrolidinone. Amino acid monomers (Sigma Aldrich) and AEEA linker (Link Technologies) were dissolved to 0.2 M in anhydrous dimethylformamide. Coupling time was 8.5 min using HATU (Alfa Aesar) as activator; double coupling was performed on all PNA monomers and amino acids. PNAs were cleaved and deprotected by treating the resin with 400  $\mu$ L of 19:1 TFA:*m*-Cresol for 90 min at room temperature. The resin was then removed with a PTFE centrifugal filter and PNAs were precipitated from cold diethyl ether and resuspended in deionized water. PNAs were purified by HPLC on a Waters XSelect CSH C18 5 $\mu$ m column at 60 °C, using gradients of acetonitrile in water containing 0.1% TFA, and were characterized on an Agilent 6530 Q-TOF LC/MS system with electrospray ionization. The PNA::NLS sequence used was GCGCTCGGCCCTTCC-[AEEA linker]-PKKKRK.

**Synthesis of PEGylated oligos.** PEG-modified oligonucleotides were synthesized using standard phosphoramidite methods on an ABI 394 synthesizer. Phosphoramidites were purchased from ChemGenes. Coupling times for 2'OMe-RNA and spacer phosphoramidites were extended to 5 min. Oligonucleotides were deprotected in concentrated aqueous ammonia at 55 °C for 16 h. Oligonucleotides were desalted using either Nap-10 (Sephadex) columns or Amicon ultrafiltration. All the PEG-modified oligonucleotides were characterized on an Agilent 6530 Q-TOF LC/MS system with electrospray ionization. The 2'-OMe RNA sequence appended to the 5'-end of donor DNAs was GGAAGGGCCGAGCGC.

**dsDNA Donor generation.** Donor template sequences with the homology arms and the desired insert for knock-in (eg: gfp), were generated by PCR. PCR products were cloned into ZeroBlunt TOPO vector (Invitrogen, #450245) and plasmids were purified using Macherey-Nagel midi-prep kits (cat# 740412.50). Using the purified plasmids as templates and PEGylated oligos as primers, donor sequences were PCR amplified with iProof (Bio-Rad,1725302, *C. elegans*) or Phusion polymerase (NEB, #M0530S, mammalian). Before use in *C. elegans* microinjections, the resulting PEGylated PCR products were excised from 0.8-1% TAE agarose gel and purified using spin-columns (Omega, #D2501-02). For use in mammalian cells, the PEGylated PCR products were purified using spin columns (Qiagen, # 28104). PCR conditions were optimized for each primer set with a gradient for the annealing temperature [1) 98°C for 1:00 min,2) 98°C for 15 sec, 3) 50°C to 64°C for 30 sec (choose optimal), 4) 72°C for 1:00 min (34 cycles), 5) 72°C for 5:00 min, 6) 4°C forever].

**Single Strand DNA donor generation.** Long single stranded DNA donors were prepared using the protocol described by Li et al <sup>1</sup>. Briefly, the donor template containing the T7 promoter was amplified using standard PCR and purified using SPRI magnetic beads (Core Genomics). T7 *in vitro* transcription was performed using the HiScribe T7 High Yield RNA Synthesis kit (NEB) and the RNA was purified using the SPRI magnetic beads. Finally, the ssDNA donor was synthesized by TGIRT<sup>TM</sup>-III (InGex) based reverse transcription using the synthesized RNA as a template and a TEG-modified or unmodified DNA primer. We then performed base-treatment to remove RNA. The donor was again purified using SPRI beads.

***C. elegans* microinjection and HDR screening.** Microinjections were performed using Cas9-RNPs at final concentrations of: 0.25 µg/µl of SpyCas9 protein (IDT, # 1074181), 0.04 µg/µl of crRNA (against the target sequence), 0.016 µg/µl of crRNA (*dpy-10*) (IDT, Alt-R CRISPR-Cas9

crRNA) and 0.1 µg/µl of tracrRNA (IDT, # 1072533) along with a series of modified or unmodified DNA donors (10 µg/ul)<sup>2</sup>. To prepare a 20 µl injection mix, Cas9, tracrRNA, crRNAs and nuclease free water were incubated at 37° C for 12 min; then, DNA donors were added to the RNPs. This injection mixture was spun down at 14000 RPM for 2 min and 17 µl of the mixture was carefully taken from the top and transferred to a fresh 1.5-ml tube. Prior to adding the donors to the injection mixture, we mixed them either with PNA-peptide ligands or water, heated the mixture to 95°C and cooled to 4°C using the thermal cycler (95°C-2:00 min; 85°C-10 sec, 75°C-10 sec, 65°C-10 sec, 55°C-1:00 min, 45°C-30 sec, 35°C-10 sec, 25°C- 10 sec, 4°C-forever). As controls, we performed microinjections with the DNA donors that lack chemical modifications. After the microinjections, injected animals (P0) were singly picked onto Normal Growth Media (NGM) plates and cultured at 20°-22°C for about 3.5 days. F1 animals exhibiting evidence of CRISPR induced lesions at a marker locus (*dpy-10*)<sup>3, 4</sup> were separated onto fresh NGM plates (5 animals/plate) and screened under a fluorescent dissection microscope for the presence or absence of GFP expression in the gonad. We then plotted the percentage of GFP positive animals among the total number of dumpys/rollers produced by each P0 animal. We have considered only those P0s that produced at least 15 F1 dumpy and/or roller animals to account for the injection quality.

***C. elegans* GFP tagging strategy.** In *C. elegans*, we aimed to insert the entire coding sequence of Green Fluorescent Protein (GFP) immediately after the ATG start codon of *csr-1* and *glh-1* genes. For *csr-1*, we used a two-step CRISPR protocol, such that the same exact reagents could be used to fuse any gene to a large DNA sequence, without requiring synthesis of modified primers for every locus (such as GFP or mCherry ~900 bp). Briefly, we employed Cas9-RNP complexes and single stranded DNA (ssODN) donor oligo (as described in<sup>2</sup> to knock-in FLAG (x3)::Glycine(x3) linker::TEV tag. Starting strain that is homozygous for 3XFLAG::GlyGlyGly::TEV::CSR-1 allele

was used to knock-in gfp sequence between flag and glycine-linker. We used a crRNA (CTATAAAGACGATGACGATA NGG) with PAM site in the glycine-linker and donor DNA with arms homologous to 35 bp of 3xflag and 30 bp of 3xglycine-linker::tev flanking the gfp sequence. Once conditions were optimized with universal 2-step system, endogenous *glh-1* locus was targeted for gfp insertion directly using *glh-1* guide and 35bp homology arms.

**Expression and purification of SpyCas9.** The pMCSG7 vector containing the 6xHis-tagged 3xNLS SpyCas9 was a gift from Scot Wolfe at UMass Medical School. This construct was transformed into the Rosetta 2 DE3 strain of *E. coli* for protein production. Expression and purification of SpyCas9 was performed as described previously <sup>5</sup>. Briefly, cells were grown at 37°C to OD600 of 0.6, at which point 1 mM IPTG (Sigma) was added and the temperature was lowered to 18°C. Cells were grown overnight and harvested by centrifugation at 4,000 g. The protein was purified first by Ni<sup>2+</sup> affinity chromatography, then by cation exchange and finally by size-exclusion chromatography.

**Cell culture and transfections.** HEK293T cells were obtained from ATCC and were cultured in standard DMEM medium (Gibco, #11995) supplemented with 10% fetal bovine serum (FBS) (Sigma, #F0392). Human foreskin fibroblasts (HFF) were maintained in DMEM medium supplemented with 20% FBS. Chinese hamster ovary (CHO) cells (obtained from ATCC) were cultured in F-12K medium (Gibco 21127022) supplemented with 10% FBS, and K562 cells were cultured in IMDM medium (Gibco 12440053) supplemented with 10% FBS. Electroporations were performed using the Neon transfection system (ThermoFisher). SpyCas9 was delivered either as a plasmid or as protein. For plasmid delivery of Cas9 and sgRNA, appropriate amounts of plasmids were mixed in ~10 µl Neon buffer-R (ThermoFisher) followed by the addition of 100,000 cells. For RNP delivery of Cas9, 20 pmol of 3xNLS-SpyCas9 and 25 pmol of crRNA-tracrRNA

were mixed in 10  $\mu$ l of buffer R. This mixture was incubated at room temperature for 30 minutes followed by the addition of 100,000 cells that were already resuspended in buffer R. This mixture was then electroporated using the 10  $\mu$ l Neon tips. Electroporation parameters (pulse voltage, pulse width, number of pulses) were 1150 v, 20 ms, 2 pulses for HEK293T cells, 1650 v, 10 ms, 3 pulses for CHO cells, 1400 v, 30 ms, 1 pulse for HFF cells and 1600 v, 10 ms, 3 pulses for K562 cells. Electroporated cells were harvested for FACS analysis 48-72 hr post electroporation unless mentioned otherwise in results.

**K562 GFP+ stable cell line generation.** Lentiviral vector expressing EGFP was cloned using the Addgene plasmid #31482. The EGFP sequence was cloned downstream of the SFFV promoter using Gibson assembly. For lentivirus production, the lentiviral vector was co-transfected into HEK293T cells along with the packaging plasmids (Addgene 12260 & 12259) in 6-well plates using TransIT-LT1 transfection reagent (Mirus Bio) as recommended by the manufacturer. After 24 hours, the medium was aspirated from the transfected cells and replaced with fresh 1 ml of fresh DMEM media. The next day, the supernatant containing the virus from the transfected cells was collected and filtered through a 0.45  $\mu$ m filter. 10  $\mu$ l of the undiluted supernatant along with 2.5  $\mu$ g of Polybrene was used to transduce ~1 million K562 cells in 6-well plates. The transduced cells were selected using media containing 2.5  $\mu$ g/ml of puromycin. Less than 20% of the transduced cells survived, and these were then diluted into 96-well plates to select single clones. One of the K562 GFP+ clones was used for the analysis shown in this study. Cas9 was electroporated into the K562 GFP+ cells as RNP (20 pmol) with a crRNA targeting the *GFP* sequence. ssODN (66 nt) with or without end modifications was provided as donor template to convert the *GFP* coding sequence to the *BFP* coding sequence. % BFP+ (precise) and % GFP (-); BFP (-) (imprecise) cells were quantified using flow cytometry.

**Flow cytometry.** The electroporated cells were analyzed on a MACSQuant VYB from Miltenyi Biotec. Cells were gated first based on forward and side scattering to select “live” cells and then for single cells. GFP-positive cells were identified using the blue laser (488 nm) and 525/50 nm filter whereas for the detection of mCherry positive cells, yellow laser (561 nm) and 615/20 nm filter were used. BFP-positive cells were identified using the violet laser (405 nm) and 450±50 nm filter. The gating strategy is shown in **Supplementary Fig.7**.

**Statistics.** ANOVA tests were performed, and adjusted P values were obtained using Tukey’s multiple comparisons test. All mammalian experiments were performed with at least 3 replicates and the n values for number of *dpy-10* edited worms scored for GFP expression are shown in the figures. All the statistical analyses were performed using GraphPad Prism (v7.0).



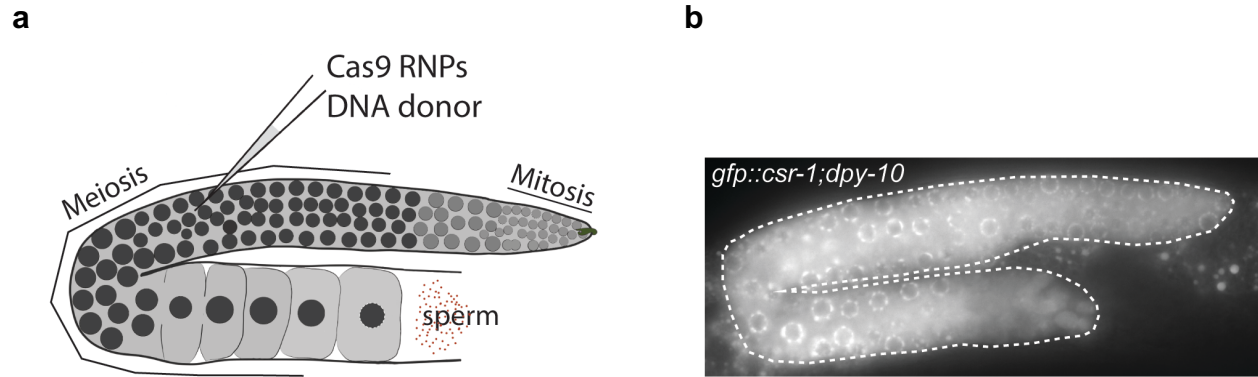

**Supplementary Fig. 1.** (a) Illustration of microinjection into the *C. elegans* hermaphrodite gonad arm. Most of the germline is in the meiotic stage with non-dividing nuclei sharing the common cytoplasm (syncytium). The total number of fertilized eggs is limited by the number of available sperm. Cas9 RNPs and the donor DNA are injected into the syncytium. (b) After the injection, F1 *dpy-10* edited animals were screened for GFP::CSR-1 expression in the gonad (P-granules).

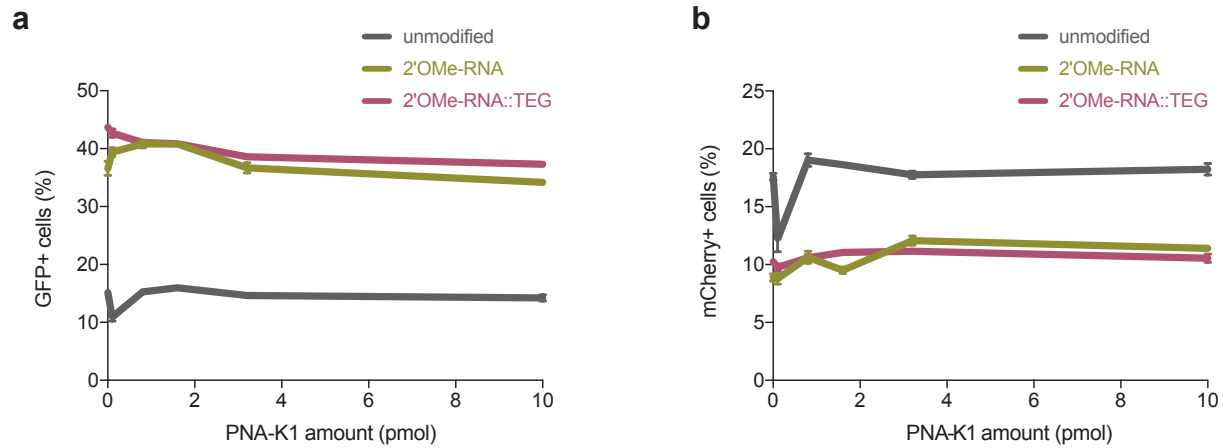

**Supplementary Fig. 2.** Addition of PNA-K1 (without NLS) to unmodified or end-modified donors does not further improve HDR efficiency in mammalian cells. 0.8 pmol of each type of donor was annealed to PNA-K1 (0.1 to 10 pmol). Editing efficiency was plotted as percentage of **(a)** GFP+ (precise) cells and **(b)** mCherry+ (imprecise) cells. Percentages were calculated by sorting the cells through flow cytometry (see Methods).

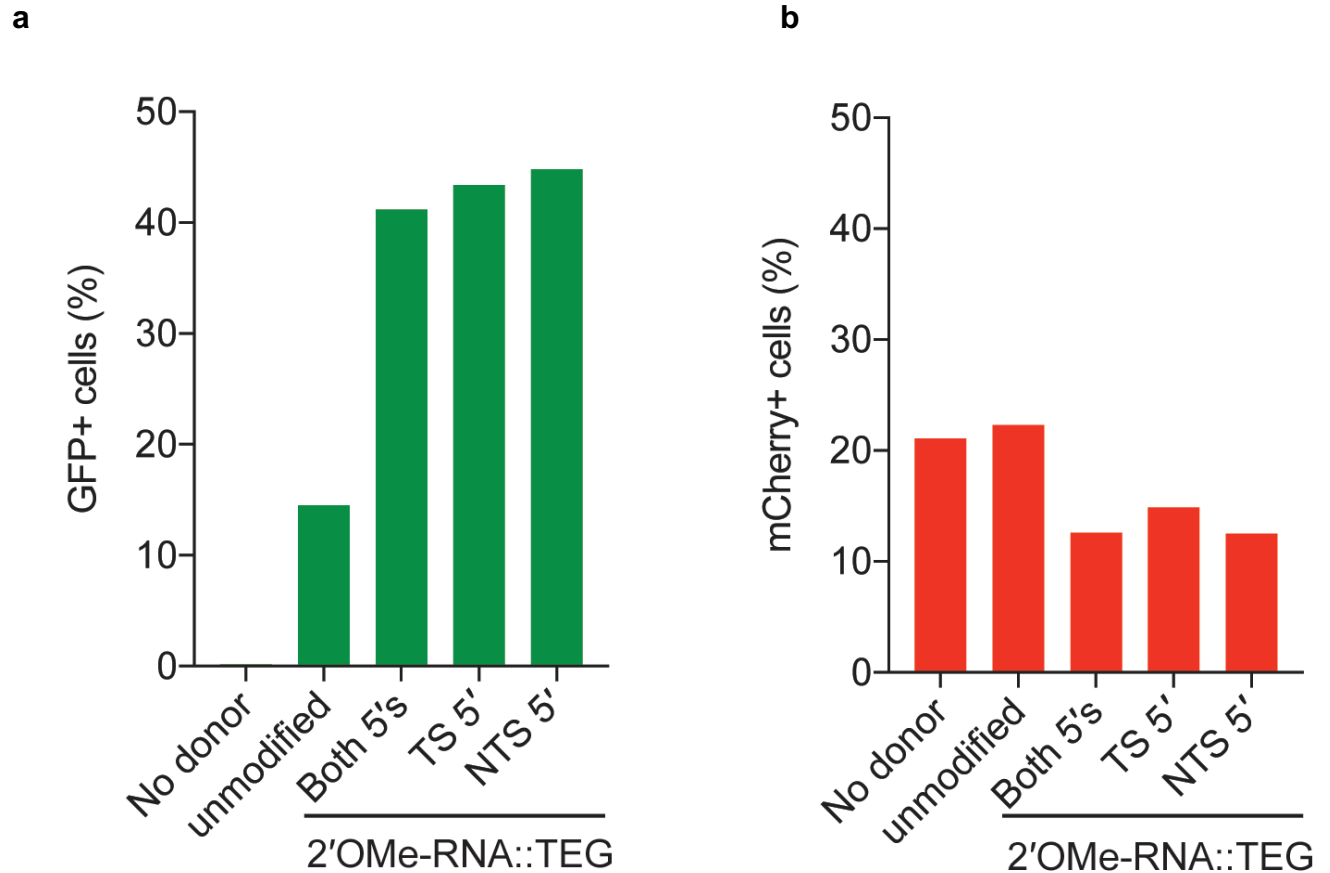

**Supplementary Fig. 3.** 5' end modifications on either strand of dsDNA donor promote HDR in TLR-HEK293 cells. Editing efficiency is plotted as percentage of (a) GFP+ (precise) and (b) mCherry+ (imprecise) with 2'OMe-RNA::TEG modifications at 5' ends of both the strands, Target Strand (TS), or Non-target Strand (NTS). 1.2 pmol of donors were used; percentages of GFP+ and mCherry+ cells were calculated using flow cytometry (see Methods). TS is defined as crRNA-complementary strand, and NTS is defined as crRNA-noncomplementary strand.

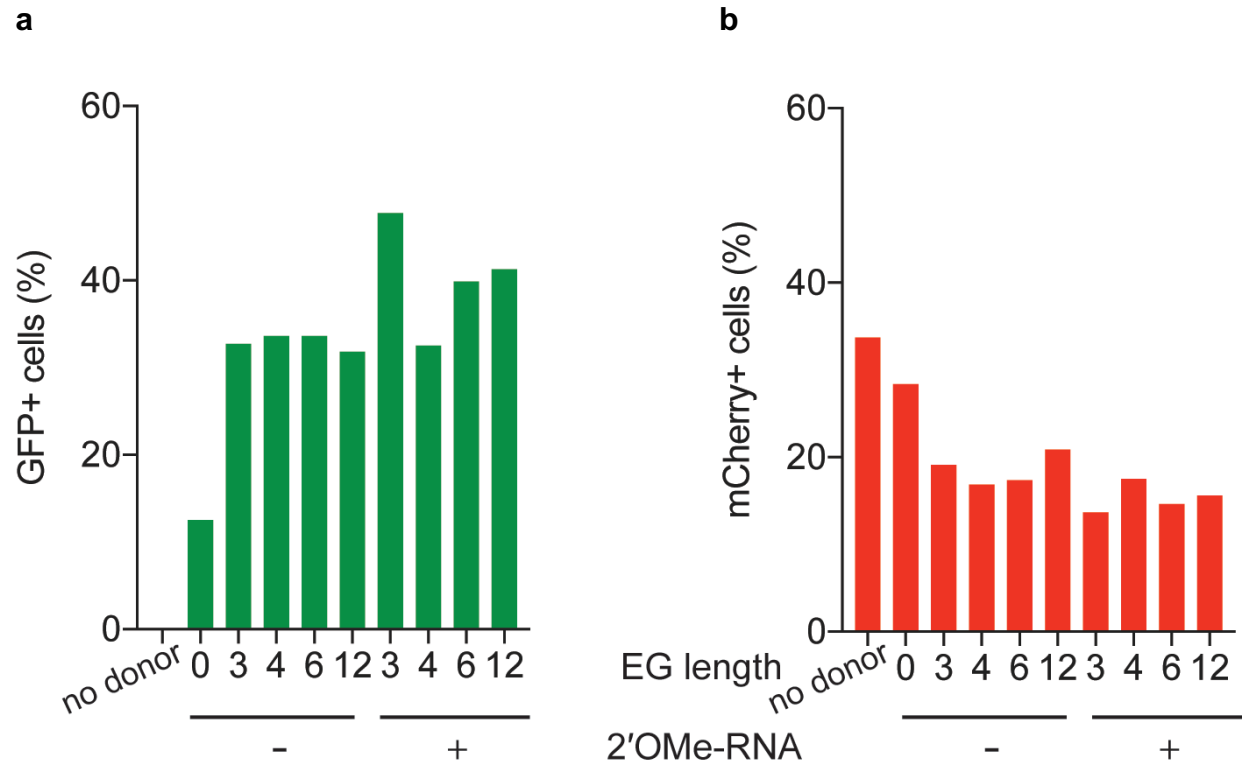

**Supplementary Fig. 4.** Different lengths of ethylene glycol units promote HDR in TLR-HEK293 cells. Editing efficiency is plotted as percentage of **(a)** GFP+ (precise) and **(b)** mCherry+ (imprecise). Numbers on the x-axes represent the number of ethylene glycols used on the 5' ends of the donor DNA, without (-) or with (+) 2'OMe-RNA. 1.2 pmol of donors were used; percentages of GFP+ and mCherry+ cells were calculated using flow cytometry (see Methods).

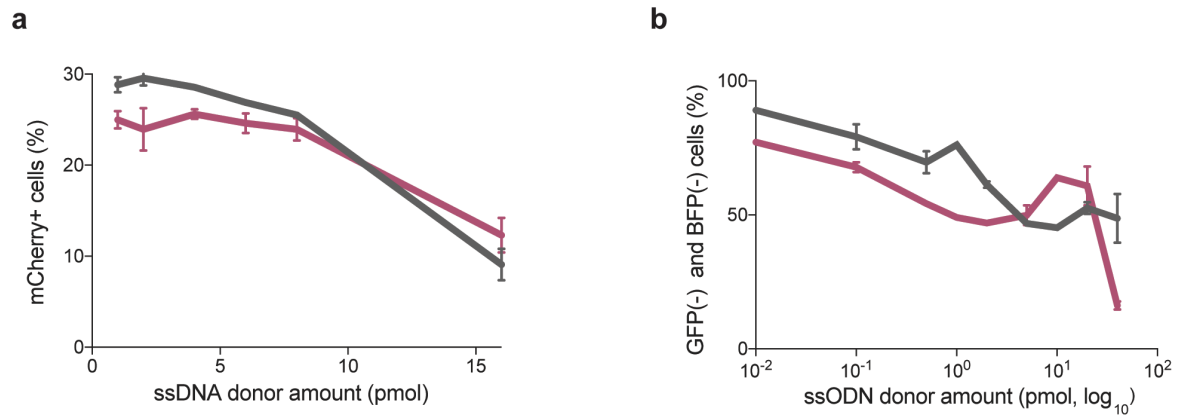

**Supplementary Fig. 5.** 2'OMe-RNA::TEG modification of long ssDNA and ssODN donors results in reduced imprecise editing. **(a)** Imprecise editing efficiency plotted as percentage of mCherry+ HEK293T TLR cells at different amounts of unmodified or TEG::2'OMe-RNA-modified ssDNA donor. The efficiency of precise editing is plotted in **Fig. 2i**. **(b)** Imprecise editing efficiency plotted as percentage of GFP- and BFP- cells in GFP-to-BFP reporter K562 cells using different amounts of unmodified and TEG::2'OMe-RNA-modified ssODN donors. The efficacy of precise editing is plotted in **Fig. 2j**.

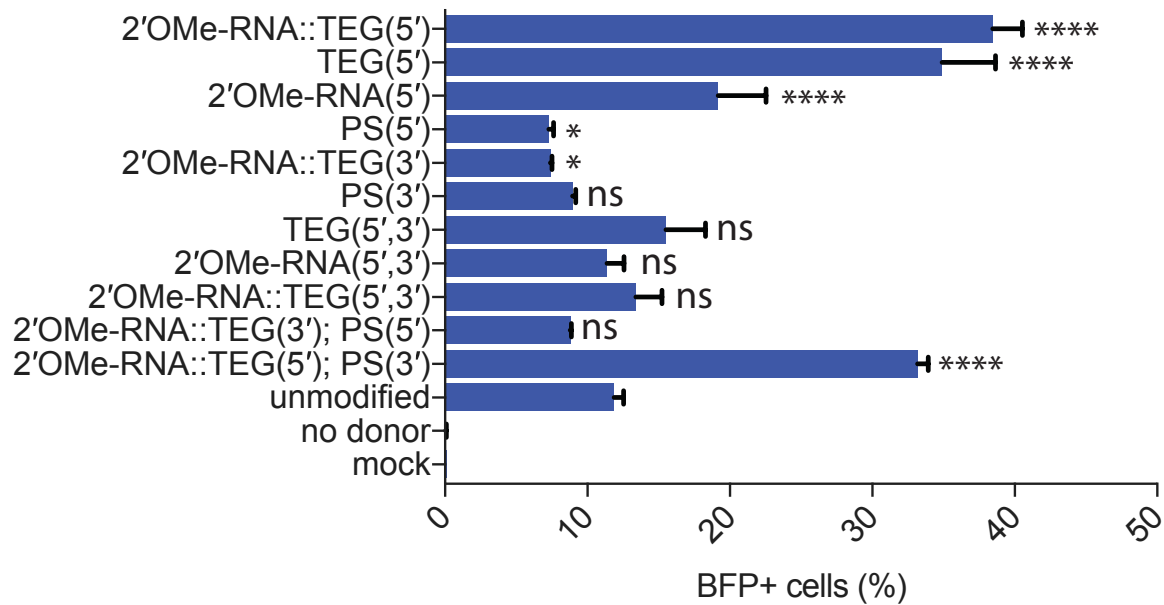

**Supplementary Fig. 6.** Effects of terminal and non-terminal modifications of ssODN donors on HDR efficacy. Editing efficacy of GFP to BFP conversion in K562 cells using 0.5 pmol of ssODN donors modified at the 5' end alone, the 3' end alone, or at both the 5' and 3' ends, with phosphorothioate (PS) TEG, 2'OMe-RNA, or 2'OMe-RNA::TEG, plotted as percentage of BFP+ cells (precise). This figure consists of the data shown in **Fig. 2k** along with other controls and modifications of the donors. Note that the PS modification is at the 5' or 3' *internal* linkages while TEG modifications are appended to the 5' or 3' terminus.

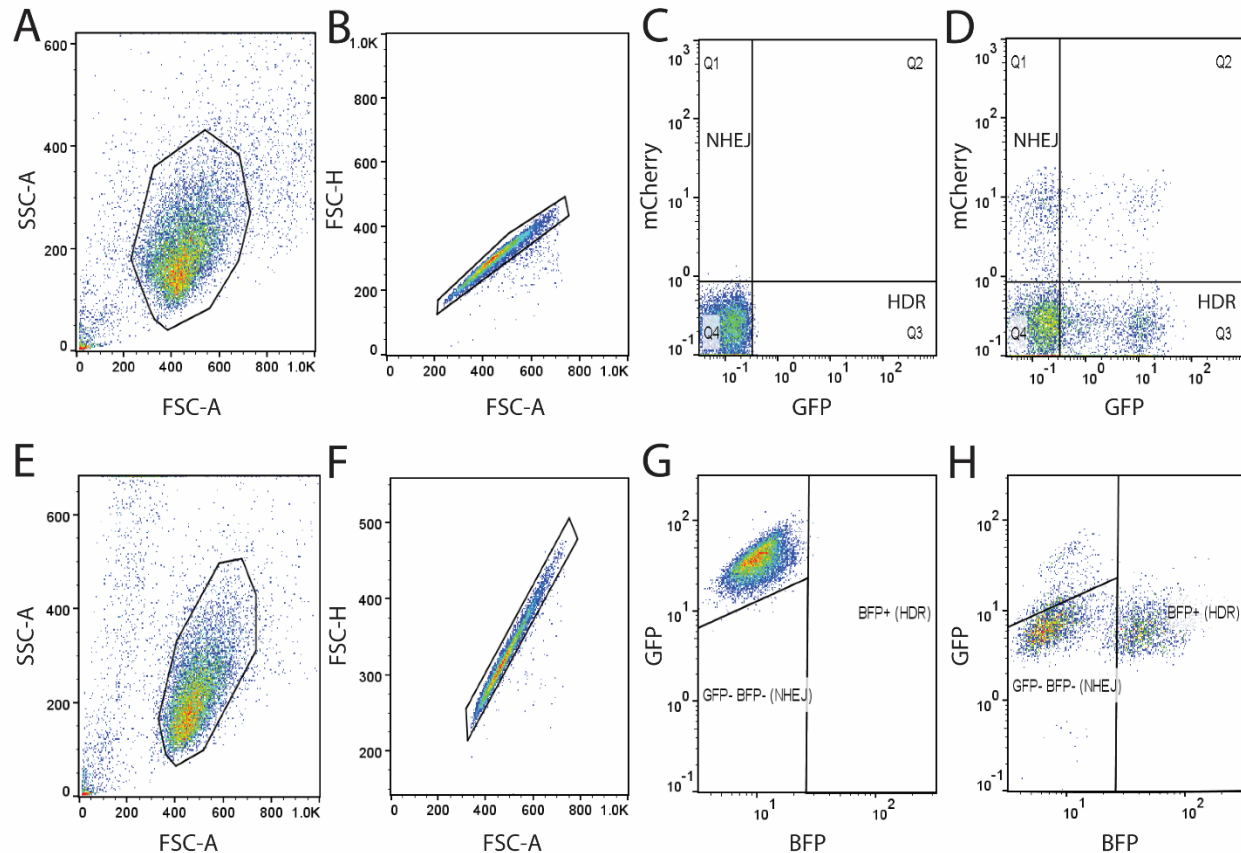

**Supplementary Fig. 7.** Flow cytometry analysis to determine the percentage of precise and imprecise genome editing events. The gating strategies used for HEK293T TLR cells (**Top**) and K562 GFP+ cells (**Bottom**) are shown. Cells were first gated based on forward and side scattering to select “live” cells (**a, e**), and then gated to select singlets (**b, f**). **c, d.** Quadrant gates were drawn to isolate GFP+ mCherry- cells (indicating successful HDR) and mCherry+ GFP- cells (indicating imprecise repair) for mock-transfected sample (**c**) and treated sample (**d**). **g, h.** K562 GFP+ cells were gated for BFP+ events (precise) and double-negative events (imprecise). Representative mock-transfected sample is shown in **g** and treated sample in **h**.

### Supplementary References

1. Li, H. et al. Design and specificity of long ssDNA donors for CRISPR-based knock-in. *bioRxiv* (2017).
2. Dokshin, G.A., Ghanta, K.S., Piscopo, K.M. & Mello, C.C. Robust genome editing with short single-stranded and long, partially single-stranded DNA donors in *C. elegans*. *bioRxiv* (2018).
3. Kim, H. et al. A co-CRISPR strategy for efficient genome editing in *Caenorhabditis elegans*. *Genetics* **197**, 1069-1080 (2014).
4. Arribere, J.A. et al. Efficient marker-free recovery of custom genetic modifications with CRISPR/Cas9 in *Caenorhabditis elegans*. *Genetics* **198**, 837-846 (2014).
5. Jinek, M. et al. A programmable dual-RNA-guided DNA endonuclease in adaptive bacterial immunity. *Science* **337**, 816-821 (2012).
